# Supplementary material for: Long non-coding RNA HOTAIR drives EZH2-dependent myofibroblast activation in systemic sclerosis through miRNA 34a-dependent activation of NOTCH
Source: HighWire-hosted journal article supplement (doi:10.1136/annrheumdis-2019-216542), 2020-02-10

## Supplementary Figure 1 Inhibition of EZH2 in SSc fibroblasts with GSK126 reduces expression of Collagen and SMA

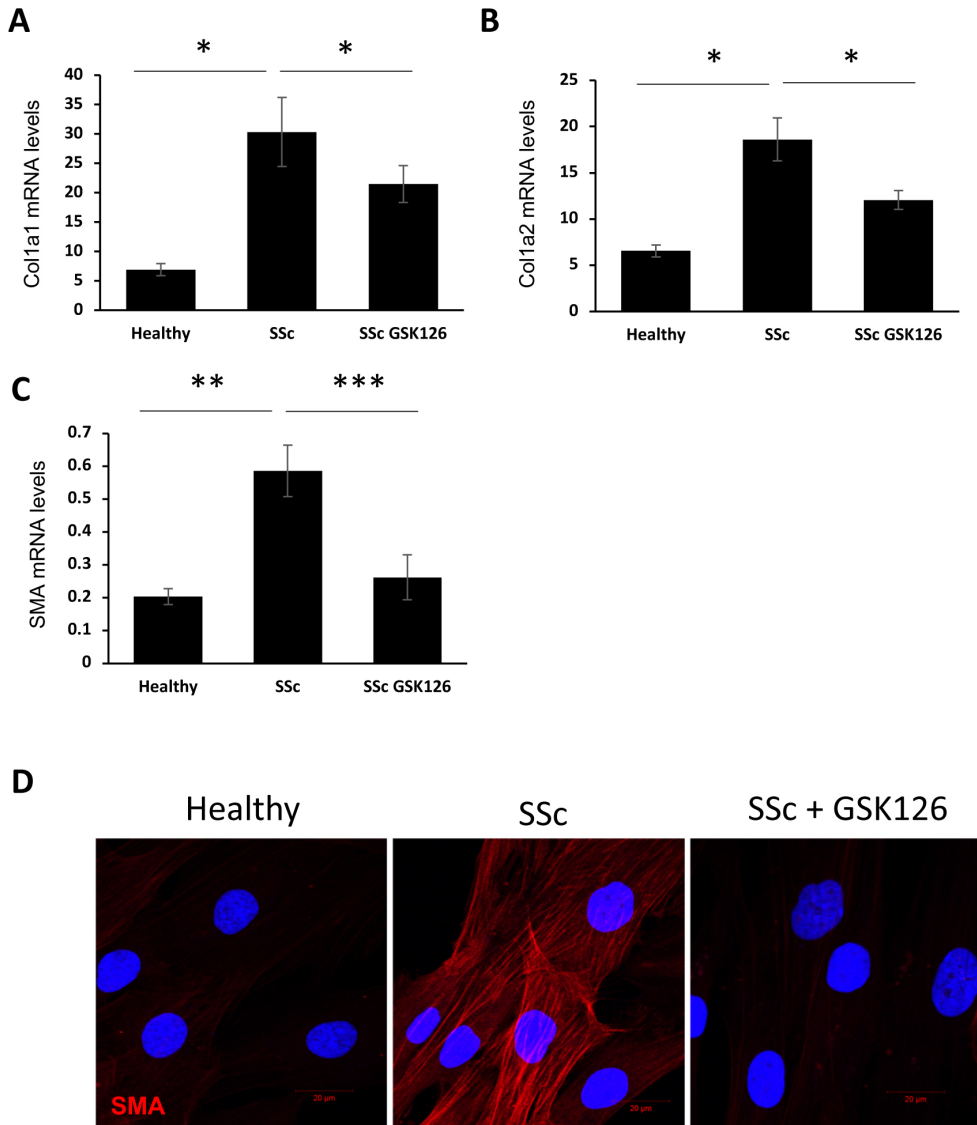

Supplement: annrheumdis-2019-216542supp005_data_supplement.pdf [file annrheumdis-2019-216542supp005_data_supplement.pdf]
