# Supplementary figures and images for: Long non-coding RNA HOTAIR drives EZH2-dependent myofibroblast activation in systemic sclerosis through miRNA 34a-dependent activation of NOTCH
Source: HighWire-hosted journal article supplement (doi:10.1136/annrheumdis-2019-216542), 2020-02-10

## Supplementary Figure 2 HOTAIR induces fibrotic phenotype through Notch 1

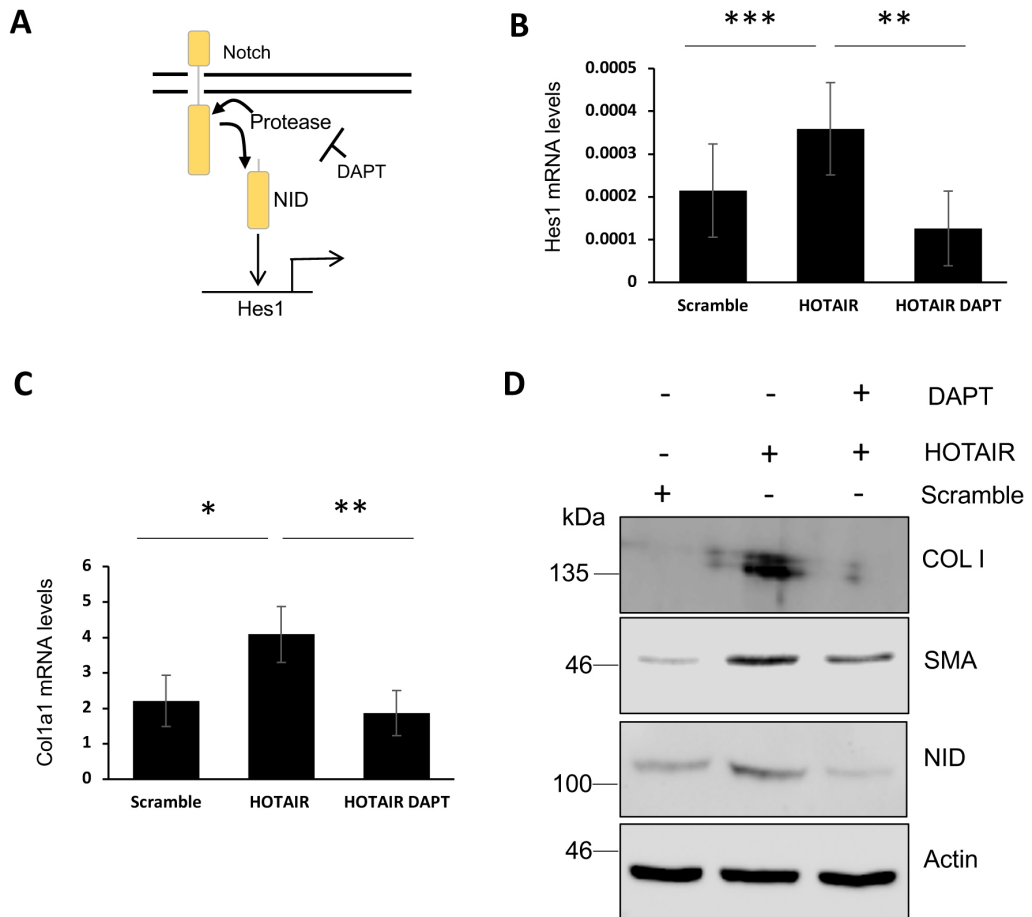

Supplement: annrheumdis-2019-216542supp003_data_supplement.pdf [file annrheumdis-2019-216542supp003_data_supplement.pdf]

## Supplementary Figure 3

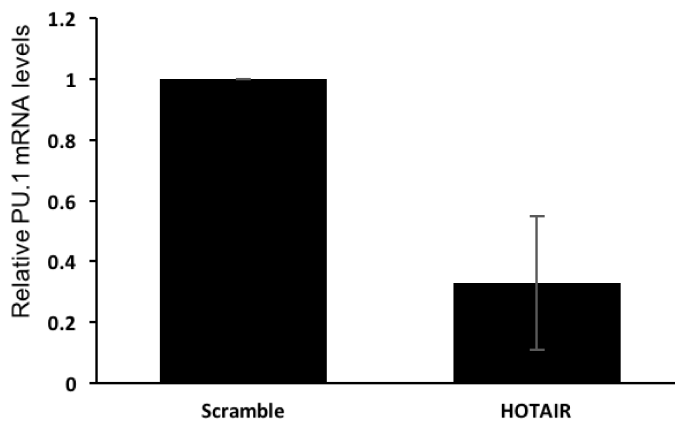

Supplement: annrheumdis-2019-216542supp004_data_supplement.pdf [file annrheumdis-2019-216542supp004_data_supplement.pdf]
